# Supplementary material
Source: PubMed Central journal article supplement (PMC9430896)
Supplement: spectrum.00383-22-s0001.pdf [file spectrum.00383-22-s0001.pdf]

Title: Early queen development in honey bees: Social context and queen breeder source affects gut microbiota and associated metabolism

Authors: Duan C. Copeland, Kirk E. Anderson and Brendon M. Mott

Corresponding author. Email: kirk.anderson@ars.usda.gov

Table S1: Primers used in this study

| <b>Gene<br/>(accession<br/>number)</b>     | <b>Forward 5'-3'</b>          | <b>Reverse 5'-3'</b>    | <b>Study</b>            |
|--------------------------------------------|-------------------------------|-------------------------|-------------------------|
| <i>actin</i><br>(XM_623378)                | TGCCAACACTGTCCTTTCTG          | AGAATTGACCCACCAATCCA    | Alaux et al., 2011      |
| <i>vitellogenin (vg)</i><br>(AJ517411)     | GTTGGAGAGCAACATGCAGA          | TCGATCCATTCTTGATGGT     | Salmela et al.,<br>2016 |
| <i>vg-like-B</i><br>(XM_006561115.1)       | ATTGCAACAATGCAGTTTGAA<br>TCAT | GCAAATCAGCCACATCTTTAGGA | Salmela et al.,<br>2016 |
| <i>Glucose oxidase</i><br>(NM_001011574.1) | GAGGGCGGAAAATCATCAGA<br>CC    | AGGATTACCCGAGATCACCTGC  | Ohashi et al.,<br>1999  |
| IRP30<br>(JN104327)                        | TTGTGAGCGATGTCCCAAAC<br>TT    | GCCGGTCTCGGCAAATTAAG    | Albert et al., 2011     |
| ILP1<br>(GB17332)                          | GCTCAGGCTGTGCTCGAAAA<br>GT    | CGTTGTATCCACGACCCTTGC   | Ament et al, 2008       |
| <i>abaecin</i><br>(GB18323)                | CAGCATTTCGCATACGTACCA         | GACCAGGAAACGTTGGAAAC    | Evans et al.,<br>2006   |
| <i>apidaecin</i><br>(GB17782)              | TAGTCGCGGTATTTGGGAAT          | TTTCACGTGCTTCATATTCTTCA | Evans et al.,<br>2006   |
| <i>Bgluc1</i><br>(GB19492)                 | GGACAACCACCTTTTGAACG          | AGGAGCTTCCTCTGCACTGA    | Evans et al.,<br>2006   |
| <i>defensin2</i><br>(GB10036)              | GCAACTACCGCCTTTACGTC          | GGGTAACGTGCGACGTTTTA    | Evans et al.,<br>2006   |
| <i>Dredd</i><br>(GB17683)                  | GCGTCATAAAGAAAAAGGAT<br>CA    | TTTCGGGTAATTGAGCAACG    | Evans et al.,<br>2006   |
| <i>DSCAM</i><br>(GB11871)                  | TTCAGTTCACAGCCGAGATG          | ATCAGTGTCCCGCTAACCTG    | Evans et al.,<br>2006   |
| <i>Hymenoptaecin</i><br>(GB17538)          | CTCTTCTGTGCCGTTGCATA          | GCGTCTCCTGTCATTCCATT    | Evans et al.,<br>2006   |
| <i>Imd</i><br>(GB18606)                    | TGTTAACGACCGATGCAAAA          | CATCGCTCTTTTCGGATGTT    | Evans et al.,<br>2006   |
| <i>Lysozyme1</i><br>(GB10231)              | GAACACACGGTTGGTCACTG          | ATTTCCAACCATCGTTTTCG    | Evans et al.,<br>2006   |
| <i>lysozyme2</i><br>(GB15106)              | CCAAATTAACAGCGCCAAGT          | GCAATTCTTCACCCAACCAT    | Evans et al.,<br>2006   |
| <i>PGRPLC</i><br>(GB17188)                 | TCCGTCAGCCGTAGTTTTTC          | CGTTTTGTGCAAATCGAACAT   | Evans et al.,<br>2006   |
| <i>PPO</i><br>(GB18767)                    | GTTTGGTCGACGGAAGAAAA          | CCGTCGACTCGAAATCGTAT    | Evans et al.,<br>2006   |
| <i>Relish</i><br>(GB13742)                 | GCAGTGTTGAAGGAGCTGAA          | CCAATTCTGAAAAGCGTCCA    | Evans et al.,<br>2006   |
| <i>Toll</i><br>(GB18520)                   | TAGAGTGGCGCATTGTCAAG          | ATCGCAATTTGTCCCAAAC     | Evans et al.,<br>2006   |
| CuZn Sod<br>(NM_001178027)                 | TCAACTTCAAGGACCACATA<br>GTG   | ATAACACCACAAGCAAGACGAG  | Li et al., 2014         |
| Mn Sod<br>(NM_001178048)                   | GTCGCCAAAGGTGATGTCAA<br>TAC   | CGTCTGGTTTACCGCCATTTG   | Li et al., 2014         |

|                                   |                             |                         |                 |
|-----------------------------------|-----------------------------|-------------------------|-----------------|
| <i>catalase</i><br>(NM_001178069) | TTCTACTGTGGGTGGCGAAA<br>G   | GTGTGTTGTTACCGACCAAATCC | Li et al., 2014 |
| Gst-1<br>(NM_001178028)           | AGGAGAGGTGTGGAGAGATA<br>GTG | CGCAAATGGTCGTGTGGATG    | Li et al., 2014 |

## References

- Alaux C, Dantec C, Parrinello H, Le Conte Y. Nutrigenomics in honey bees: digital gene expression analysis of pollen's nutritive effects on healthy and varroa-parasitized bees. *BMC Genomics*. 2011 Oct 10;12:496. doi: 10.1186/1471-2164-12-496.
- Albert Š, Gätschenberger H, Azzami K, Gimple O, Grimmer G, Sumner S, Fujiyuki T, Tautz J, Mueller MJ. Evidence of a novel immune responsive protein in the Hymenoptera. *Insect Biochem Mol Biol*. 2011 Dec;41(12):968-81. doi: 10.1016/j.ibmb.2011.09.006.
- Ament SA, Corona M, Pollock HS, Robinson GE. Insulin signaling is involved in the regulation of worker division of labor in honey bee colonies. *Proc Natl Acad Sci USA*. 2008 Mar 18;105(11):4226-31. doi: 10.1073/pnas.0800630105.
- Evans, J.D. Beepath: An ordered quantitative-PCR array for exploring honey bee immunity and disease, *Journal of Invertebrate Pathology*, 2006; 93(2): 135-139. doi: 10.1016/j.jip.2006.04.004.
- Li, C., Xu B., Wang Y., Yang Z. Yang W. Protein content in larval diet affects adult longevity and antioxidant gene expression in honey bee workers. *Entomologia Experimentalis et Applicata*. 2014. 151 (1) 19 DOI: 10.1111/eea.12167
- Ohashi K, Natori S, Kubo T. Expression of amylase and glucose oxidase in the hypopharyngeal gland with an age-dependent role change of the worker honeybee (*Apis mellifera* L.). *European Journal of Biochemistry*. 1999 Oct;265(1):127-133. DOI: 10.1046/j.1432-1327.1999.00696.x.
- Salmela H, Stark T, Stucki D, Fuchs S, Freitag D, Dey A, Kent CF, Zayed A, Dhaygude K, Hokkanen H, Sundström L. Ancient Duplications Have Led to Functional Divergence of Vitellogenin-Like Genes Potentially Involved in Inflammation and Oxidative Stress in Honey Bees. *Genome Biol Evol*. 2016 Mar 9;8(3):495-506. doi: 10.1093/gbe/evw014.
